# Supplementary material
Source: publisher site journal article supplement (https://www.dovepress.com/article/295936)
Supplement: Supplementary file 1 [file get_supplementary_file.php]

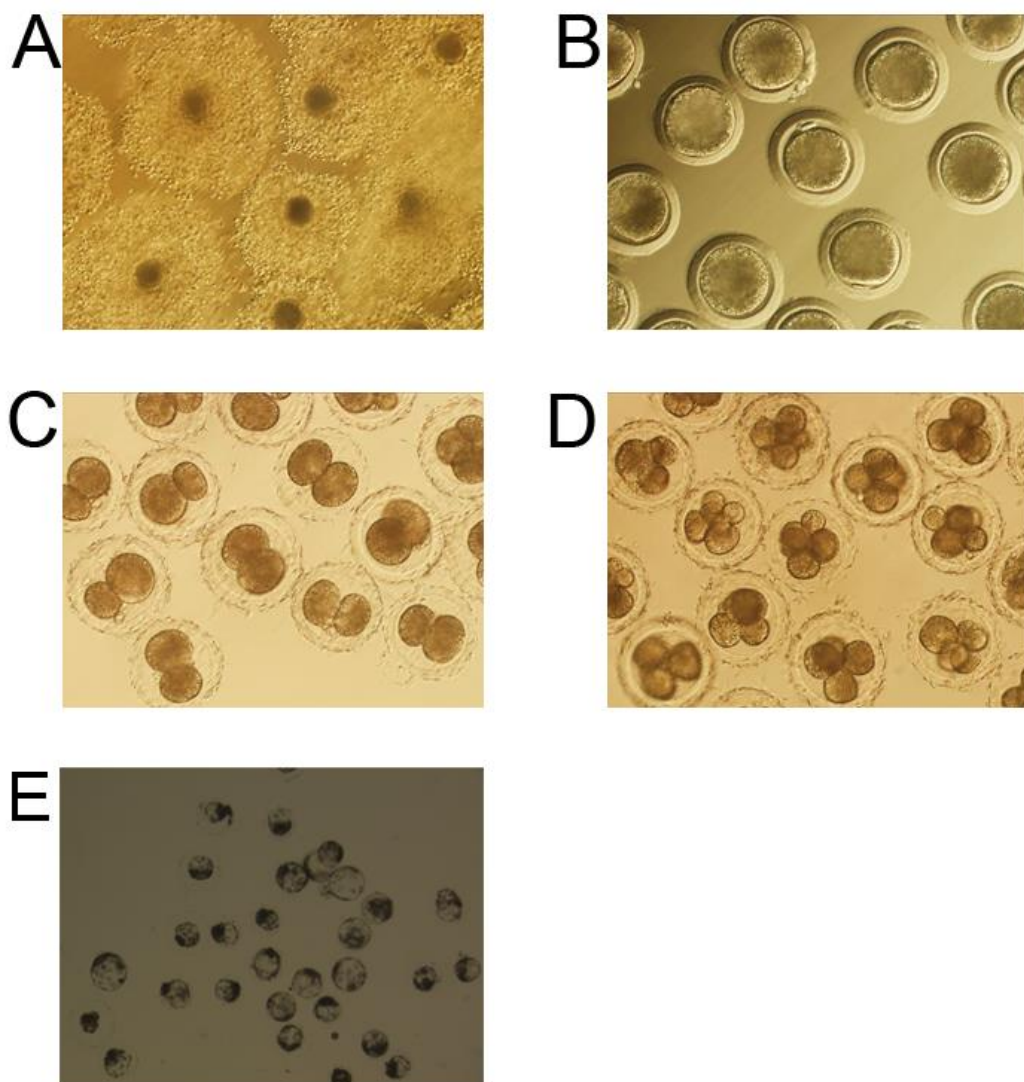

Supplemental Figure S1. The representative images of the oocytes and embryos. (A) Mature oocytes; (B) oocytes with the first polar body extrusion; (C) two-cell embryos; (D) four-cell embryos; (E) blastocysts.
